# Supplementary material for: Label-Free LC-MS/MS Analysis Reveals Different Proteomic Profiles between Egg Yolks of Silky Fowl and Ordinary Chickens
Source: MDPI journal article supplement (doi:10.3390/foods11071035), 2022-04-02
Supplement: s1 [file s1]

**Table S1** List of unique proteins in silky fowl and ordinary egg yolks

| Protein names                       | Accessions             | Unique peptides | Source of specific proteins | GO terms                                                                                                  |
|-------------------------------------|------------------------|-----------------|-----------------------------|-----------------------------------------------------------------------------------------------------------|
| Inter-alpha inhibitor heavy chain 2 | B3VE14; F1NIU3         | 9               | √                           | Glycosamin glycan metabolic process; peptidase regulator activity; peptidase inhibitor activity           |
| Ig-like domain-containing protein   | A0A3Q3AMX7             | 2               | √                           | Immune system process                                                                                     |
| Beta-microseminoprotein-like        | A0A3Q2U3V9             | 2               | √                           | Undefined*                                                                                                |
| Ceruloplasmin                       | A0A3Q3B296; A0A1D5PBP6 | 12              | √                           | Cation transport; ferroxidase activity                                                                    |
| Coagulation factor X                | P25155                 | 5               | √                           | Hemostasis; coagulation; serine-type endopeptidase activity                                               |
| Complement component 8 subunit beta | E1C7C1                 | 9               | √                           | Regulation of response to stimulus; immune effector process                                               |
| Gallinacin-9                        | Q6QLR1; A0A0N9WLX3     | 1               | √                           | Response to stress; G protein-coupled receptor binding                                                    |
| DUF4430 domain-containing protein   | A0A3Q2U8Y5             | 2               | √                           | Vitamin transport; response to stimulus; cobalamin binding                                                |
| Coagulation factor XII              | E1BZN8                 | 4               | √                           | Hemostasis; blood coagulation; serine-type endopeptidase activity                                         |
| Angiotensin 1-10                    | F1NDH2                 | 1               | √                           | Regulation of proteolysis; peptidase regulator activity; serine-type endopeptidase inhibitor activity     |
| SERPIN domain-containing protein    | F1NAR5                 | 1               | √                           | Hemostasis; blood coagulation; peptidase regulator activity; serine-type endopeptidase inhibitor activity |
| IgGFc-binding protein-like          | A0A1D5P6F4             | 10              | √                           | Undefined*                                                                                                |
| Ensconsin                           | F1NYS2;                | 1               | √                           | Microtubule                                                                                               |

|                                        |                                                                    |    |   |  |                                                                                                           |
|----------------------------------------|--------------------------------------------------------------------|----|---|--|-----------------------------------------------------------------------------------------------------------|
|                                        | A0A3Q2U3B6;<br>Q5ZIA2;<br>A0A3Q2UAA8;<br>A0A3Q2TSC0;<br>A0A1D5PR58 |    |   |  | cytoskeleton organization                                                                                 |
| Complement component 5                 | A0A1D5PD98;<br>E1BRS7;<br>A0A1D5PC67                               | 20 | √ |  | Immune effector process;<br>protein activation cascade                                                    |
| Heparin cofactor II (Fragment)         | O73840;<br>A0A1D5PLZ2                                              | 1  | √ |  | Hemostasis; blood coagulation; peptidase regulator activity; serine-type endopeptidase inhibitor activity |
| Ig-like domain-containing protein      | A0A3Q3AKX3;A0A3Q2TTN1                                              | 1  | √ |  | Immune system process                                                                                     |
| CN hydrolase domain-containing protein | A0A1D5PEU7;<br>E1BUA6                                              | 1  | √ |  | Nitrogen compound metabolic process; hydrolase activity                                                   |
| Ig-like domain-containing protein      | A0A3Q2TY60                                                         | 1  | √ |  | Immune system process                                                                                     |
| Protein piccolo (Fragment)             | Q9PU36;<br>A0A1D5PRV2;<br>A0A3Q2U9D6                               | 3  | √ |  | Multicellular organismal process; synapse organization; calcium ion binding                               |
| Ig-like domain-containing protein      | A0A3Q2TXP7;<br>A0A3Q2TYY3                                          | 1  | √ |  | Immune system process                                                                                     |
| Vitellogenin-2                         | P02845;Q6BCB8                                                      | 1  | √ |  | Response to stimulus; nutrient reservoir activity                                                         |
| UPAR/Ly6 domain-containing protein     | A0A1L1RYU0                                                         | 3  | √ |  | Regulation of response to stimulus; signaling receptor binding                                            |
| Ovalbumin-related protein Y            | P01014; I0J178;<br>E1BTF4; I0J179                                  | 4  | √ |  | Regulation of proteolysis; peptidase regulator activity; serine-type endopeptidase inhibitor activity     |
| SERPIN domain-containing protein       | E1C7T1                                                             | 5  | √ |  | Regulation of proteolysis; peptidase regulator activity                                                   |
| Fibronectin                            | A0A3Q2TW07;<br>A0A1D5NU50;                                         | 28 | √ |  | Extracellular region                                                                                      |

|                                                           |                                                                                       |    |   |                                                                                                                 |
|-----------------------------------------------------------|---------------------------------------------------------------------------------------|----|---|-----------------------------------------------------------------------------------------------------------------|
|                                                           | FINJT3; F1NJT4;<br>P11722; O57403                                                     |    |   |                                                                                                                 |
| Apo AI promoter<br>B-region binding<br>protein (Fragment) | Q9DE41;F1NHT5                                                                         | 2  | √ | Response to stress;<br>negative regulation of<br>response to external<br>stimulus; enzyme<br>regulator activity |
| Thrombospondin-3<br>(Fragment)                            | Q8QGY2                                                                                | 1  | √ | Cell adhesion; calcium ion<br>binding                                                                           |
| Ig-like<br>domain-containing<br>protein                   | A0A3Q2TW03                                                                            | 0  | √ | Immune system process                                                                                           |
| Attractin                                                 | A0A3Q2UQ06;<br>F1P2W2                                                                 | 2  | √ | Integral component of<br>membrane; signaling<br>receptor activity                                               |
| 60 kDa heat shock<br>protein,<br>mitochondrial            | Q5ZL72                                                                                | 10 | √ | Regulation of proteolysis;<br>response to stress;<br>protein-lipid complex<br>binding                           |
| Ig-like<br>domain-containing<br>protein                   | A0A3Q2UH03                                                                            | 1  | √ | Immune system process                                                                                           |
| Transcription factor<br>SOX-2                             | P48430                                                                                | 1  | √ | Negative regulation of<br>cellular metabolic process                                                            |
| Ig-like<br>domain-containing<br>protein                   | A0A3Q2TYH6                                                                            | 2  | √ | Immune system process                                                                                           |
| Alpha-1-acid<br>glycoprotein                              | Q8JIG5; A7UEB0                                                                        | 2  | √ | Regulation of immune<br>system process; immune<br>system process                                                |
| 14-3-3 protein<br>epsilon                                 | Q5ZMT0                                                                                | 5  | √ | Response to stress;<br>molecular function<br>regulator                                                          |
| Anticoagulant<br>protein C                                | Q804X5; F1NGY6                                                                        | 2  | √ | Hemostasis; blood<br>coagulation; serine-type<br>endopeptidase activity                                         |
| SERPIN<br>domain-containing<br>protein                    | A0A1D5PI58;<br>R9TNA6; P01013                                                         | 4  | √ | Extracellular region;<br>serine-type endopeptidase<br>inhibitor activity                                        |
| Polyubiquitin<br>(Fragment)                               | Q9PST8; P79781;<br>Q91021;<br>A0A1D5P546;<br>P0CG62; Q91022;<br>O42388;<br>A0A1L1RTM7 | 3  | √ | Regulation of proteolysis                                                                                       |

|                                                            |                                                                                                                                                                                  |   |   |                                                                                                      |
|------------------------------------------------------------|----------------------------------------------------------------------------------------------------------------------------------------------------------------------------------|---|---|------------------------------------------------------------------------------------------------------|
| Antithrombin-III<br>(Fragment)                             | Q91422; F1NLP7                                                                                                                                                                   | 2 | √ | Hemostasis; peptidase<br>regulator activity;<br>serine-type endopeptidase<br>inhibitor activity      |
| Fibulin-1                                                  | O73775; F1NX60;<br>A0A1L1RU28                                                                                                                                                    | 5 | √ | Extracellular structure<br>organization; peptidase<br>regulator activity                             |
| Ig-like<br>domain-containing<br>protein                    | A0A3Q2U5V5                                                                                                                                                                       | 2 | √ | Immune system process                                                                                |
| Ig-like<br>domain-containing<br>protein                    | A0A3Q2U3K4                                                                                                                                                                       | 1 | √ | Immune system process                                                                                |
| Tubulin alpha chain                                        | A0A1D5NW27;<br>P02552; F1NWX0;<br>F1NW97;<br>A0A3Q2U7S4                                                                                                                          | 0 | √ | Regulation of biological<br>quality; synapse<br>organization                                         |
| Ubiquitinyl<br>hydrolase 1                                 | V9GVG9; E1BWJ5                                                                                                                                                                   | 2 | √ | Proteolysis; peptidase<br>activity, acting on L-amino<br>acid peptides                               |
| WH1<br>domain-containing<br>protein                        | A0A3Q3A4T5                                                                                                                                                                       | 1 | √ | Catalytic activity, acting<br>on a protein                                                           |
| N-acetylglucosamine<br>-6-sulfatase                        | F1NI04                                                                                                                                                                           | 2 | √ | Glycosaminoglycan<br>metabolic process                                                               |
| Peptidase_M14<br>domain-containing<br>protein              | F1NXB6                                                                                                                                                                           | 5 | √ | Hemostasis; blood<br>coagulation                                                                     |
| Pyruvate<br>dehydrogenase E1<br>component subunit<br>alpha | Q5F426;<br>A0A1D5PEH3                                                                                                                                                            | 2 | √ | Acetyl-CoA biosynthetic<br>process                                                                   |
| Actin, cytoplasmic 1                                       | P60706; P53478;<br>P63270; P68139;<br>P68034; P08023;<br>F1P476;<br>A0A1D5NV17;<br>A0A3Q3AWV3;<br>A0A1D5PK53;<br>Q90736; B5M200;<br>A0A3Q3A5C8;<br>Q0QWA1;<br>G8HUH5;<br>A9YXX3; | 1 | √ | Multicellular organismal<br>process; structural<br>constituent of postsynaptic<br>actin cytoskeleton |

|                                                        |                                                                                                                 |    |   |  |                                                                                                       |
|--------------------------------------------------------|-----------------------------------------------------------------------------------------------------------------|----|---|--|-------------------------------------------------------------------------------------------------------|
|                                                        | A9YXX2;<br>G4WW42;<br>E1BXV2                                                                                    |    |   |  |                                                                                                       |
| Glycosyl-phosphatidylinositol-specific phospholipase D | A0A1D5PHH6;<br>A0A3Q2ULQ6                                                                                       | 2  | √ |  | Glycerolipid metabolic process;<br>glycosylphosphatidylinositol phospholipase D activity              |
| Glutamate dehydrogenase                                | A0A2L2FP59;<br>A0A1D5NT61;<br>P00368                                                                            | 2  | √ |  | Nitrogen compound metabolic process;<br>oxidoreductase activity, acting on the CH-NH2 group of donors |
| Vitamin K-dependent protein S                          | A0A3Q2U504;<br>E1C6L4                                                                                           | 12 | √ |  | Hemostasis; blood coagulation; response to stress                                                     |
| Eukaryotic translation elongation factor 1 alpha 1     | A0A1I7Q425;<br>A0A1D5P5X9;<br>Q90835;<br>Q5ZKM2;<br>A0A1L1RRR1                                                  | 1  | √ |  | GTPase activity; purine ribonucleoside binding                                                        |
| 14-3-3 protein zeta                                    | Q5ZKC9;<br>A0A1L1RSI2                                                                                           | 6  | √ |  | Extracellular region                                                                                  |
| Apolipoprotein B                                       | Q197X2; P11682;<br>Q7LZ77                                                                                       | 6  | × |  | Lipid transporter activity                                                                            |
| Cilia- and flagella-associated protein 36              | A0A3Q2U353;<br>A0A1D5PW31;<br>A0A3Q2U0Q7                                                                        | 1  | × |  |                                                                                                       |
| Dynactin subunit 1                                     | P35458;<br>A0A1D5PEZ3;<br>A0A1D5PWC0;<br>A0A1D5PVT2;<br>A0A3Q3APS1;<br>A0A1D5PCY8;<br>A0A3Q2UPN5;<br>A0A1D5NTW5 | 3  | × |  | Regulation of intracellular protein transport;<br>microtubule end                                     |
| Voltage-dependent anion-selective channel protein 1    | A0A1D5NTT4;<br>E1BYN7                                                                                           | 3  | × |  | Response to stress;<br>negative regulation of metabolic process                                       |
| VWFA domain-containing protein                         | E1BZM3                                                                                                          | 1  | × |  | RNA 3'-end processing;<br>snRNA metabolic process                                                     |
| Ig-like domain-containing                              | A0A3Q2UCM5                                                                                                      | 1  | × |  | Immune system process                                                                                 |

protein

---

Notes: √, unique proteins in SFEYs; ×, unique proteins in LEYs; ★, the protein has no defined GO function. All proteins are arranged in descending order of abundance.
